# Supplementary material for: Synthesis of copper–silver–zinc oxide nanocomposites for 4-nitrophenol reduction: doping and heterojunction
Source: Royal Society of Chemistry journal article supplement (doi:10.1039/d2ra07845g), 2023-01-01
Supplement: d2ra07845g1.pdf [file d2ra07845g1.pdf]

Synthesis of copper-silver-zinc oxide nanocomposites for 4-nitrophenol reduction: doping and heterojunction

Buzuayehu Abebe \*, Bontu Kefale, Dereje Tsegaye Leku \*

Adama Science and Technology University, Department of Applied Chemistry, 1888, Adama, Ethiopia

### Supplementary figure

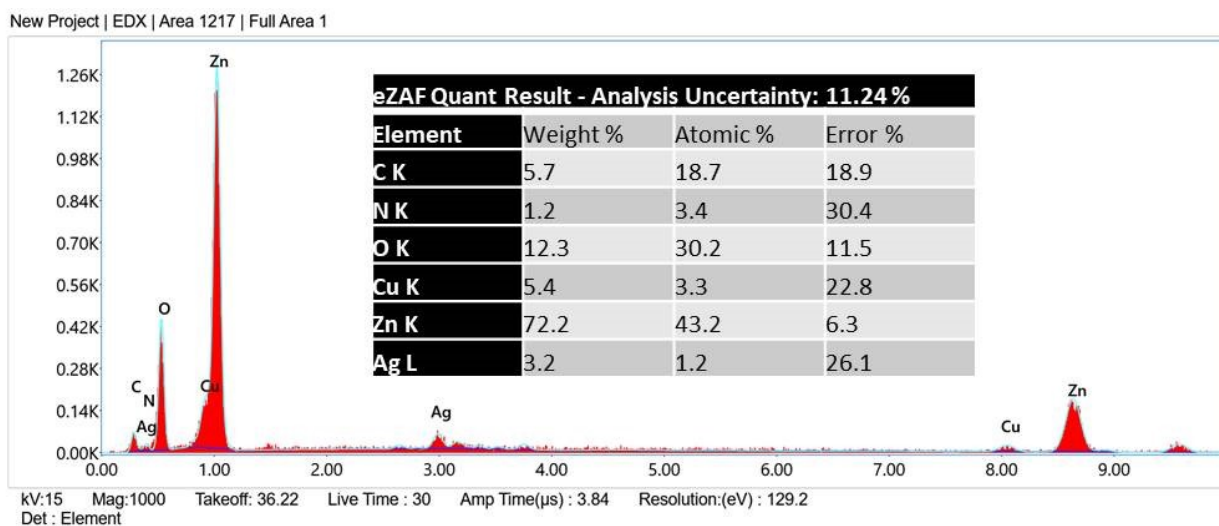

Fig. S1. Compositional analysis using Energy dispersive X-ray analysis. The EDAX analysis spectra of Cu-doped ZnO/CuO/Ag nanocomposites. The table inset in Fig. S1 is the compositional analysis results of the composite. The expected elements of Zn, Ag, Cu, and O were detected on the spectra.

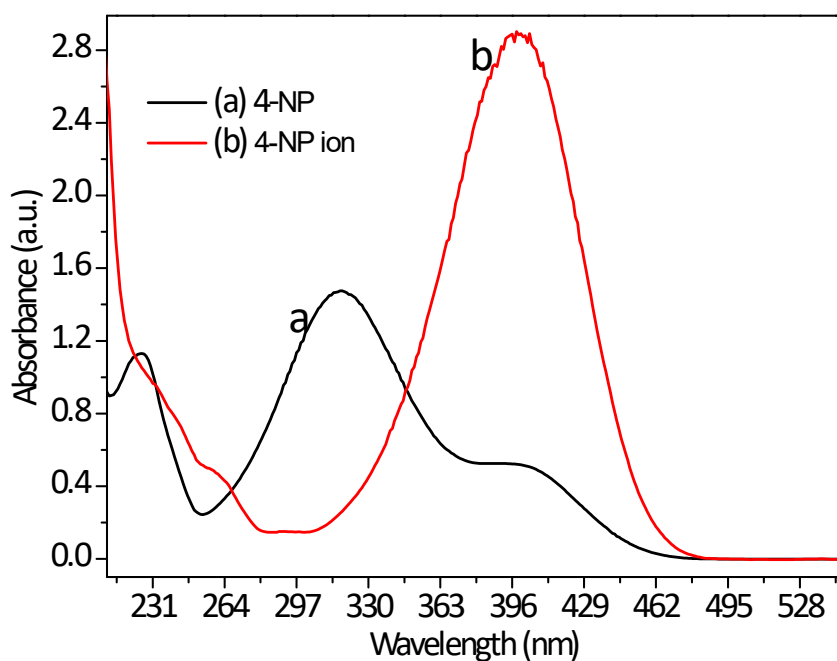

Fig. S2. When sodium borohydride is added, 4-nitrophenol, which has a maximum wavelength of 317 nm, transforms into 4-nitrophenolate ions with a maximum wavelength of 399 nm.
